# Supplementary material for: Effects of Top‐Soil Preparation and Broad‐Leaved Tree Mixture on Carabid Beetles in Afforested Fallow Plots
Source: Wiley journal article supplement (doi:10.1111/rec.12034), 2013-06-27
Supplement: rec12034-sup-0001-TableS1.pdf [file rec12034-sup-0001-TableS1.pdf]

Appendix A. Carabid beetles collected in afforested fallow land (see section Materials and Methods for habitat abbreviations). The numbers refer to dominance indices exceeding 5%; “1” is used when a dominance index was lower than 5%, “+” indicates that only a few specimens were found and “-“ indicates no catches. Column C shows species characteristics: hz – hemizoophages, Z – large zoophages, F – forest species, P – Palaearctic and Holarctic species, X – xerophilous species, W – wingless species; column NI – number of individuals

| Species                                          | C          | D   | SS   | SR   | S    | NI   |
|--------------------------------------------------|------------|-----|------|------|------|------|
| <i>Agonum fuliginosum</i> (Duftschmid, 1812)     | F, P, W    | -   | -    | +    | +    | 3    |
| <i>Amara aenea</i> (De Geer, 1774)               | hz, P, X   | +   | +    | +    | +    | 77   |
| <i>A. aulica</i> (Panzer 1797)                   | hz         | +   | -    | -    | -    | 3    |
| <i>A. apricaria</i> (Paykull, 1790)              | hz, P      | 1   | 1    | 1    | 1    | 327  |
| <i>A. bifrons</i> (Gyllenhal, 1810)              | hz, P, X   | -   | -    | +    | -    | 2    |
| <i>A. communis</i> (Panzer, 1797)                | hz, P      | +   | +    | +    | +    | 31   |
| <i>A. eurynota</i> (Panzer, 1797)                | hz, P      | -   | -    | +    | +    | 2    |
| <i>A. lunicollis</i> Schiodte, 1837              | hz, P      | +   | +    | +    | +    | 21   |
| <i>A. majuscula</i> Chaudoir, 1850               | hz         | +   | +    | +    | +    | 12   |
| <i>A. plebeja</i> (Gyllenhal, 1810)              | hz, P      | +   | +    | +    | +    | 40   |
| <i>A. similata</i> (Gyllenhal, 1810)             | hz, P      | +   | -    | -    | -    | 1    |
| <i>A. sprete</i> Dejean, 1831                    | hz, P, X   | -   | -    | +    | -    | 6    |
| <i>A. tibialis</i> (Paykull, 1798)               | hz, P, X   | +   | +    | +    | +    | 67   |
| <i>Anisodactylus binotatus</i> (Fabricius, 1792) | hz, P      | -   | +    | +    | +    | 3    |
| <i>Bembidion lampros</i> (Herbst, 1784)          | P          | +   | +    | +    | +    | 38   |
| <i>B. properans</i> (Stephens, 1828)             | P          | -   | +    | +    | +    | 22   |
| <i>B. quadrimaculatum</i> (Linnaeus, 1761)       | P          | -   | -    | -    | +    | 1    |
| <i>Bradycellus harpalinus</i> (Serville, 1821)   | hz, X      | +   | +    | +    | -    | 3    |
| <i>Brosicus cephalotes</i> (Linnaeus, 1758)      | Z, X       | -   | +    | -    | -    | 1    |
| <i>Carabus auratus</i> Linnaeus, 1761            | Z, X, W    | -   | -    | +    | -    | 66   |
| <i>Carabus arvensis</i> Herbst, 1784             | Z, F, X, W | +   | +    | +    | +    | 1    |
| <i>C. cancellatus</i> Illiger, 1798              | Z, W       | 17  | 10.0 | 20.6 | 13.8 | 2009 |
| <i>C. convexus</i> Fabricius, 1775               | Z, F, X, W | -   | 1    | +    | +    | 58   |
| <i>C. granulatus</i> Linnaeus, 1758              | Z          | +   | +    | +    | +    | 35   |
| <i>C. hortensis</i> Linnaeus, 1758               | Z, F, W    | +   | -    | -    | +    | 3    |
| <i>C. nemoralis</i> O.F.Müller, 1764             | Z, F, W    | +   | -    | +    | +    | 10   |
| <i>C. nitens</i> Linnaeus, 1758                  | Z, F, W    | +   | +    | -    | +    | 9    |
| <i>C. violaceus</i> Linnaeus, 1758               | Z, F, W    | 1   | 1    | +    | 1    | 149  |
| <i>Calathus ambiguus</i> (Paykull, 1790)         | P, X       | +   | +    | +    | +    | 10   |
| <i>C. erratus</i> (C.R.Sahlberg, 1827)           | P, X       | 1   | 1    | 5.6  | 1    | 392  |
| <i>C. fuscipes</i> (Goeze, 1777)                 | P, W       | 6.7 | 1    | 6.4  | 1    | 640  |
| <i>C. melanocephalus</i> (Linnaeus, 1758)        | P          | +   | 1    | 1    | 1    | 221  |
| <i>C. micropterus</i> (Duftschmid, 1812)         | F, W       | +   | +    | +    | +    | 27   |
| <i>Clivina fossor</i> (Herbst, 1784)             |            | 1   | +    | +    | +    | 70   |
| <i>Cychrus caraboides</i> (Linnaeus, 1758)       | Z, F, W    | +   | +    | +    | +    | 19   |
| <i>Cymindis macularis</i> Mannerheim, 1824       | X          | -   | -    | +    | -    | 1    |
| <i>C. vaporariorum</i> (Linnaeus, 1758)          | X          | -   | -    | +    | -    | 2    |
| <i>Dolichus halensis</i> (Schaller, 1783)        | Z, P, X    | +   | -    | +    | +    | 14   |
| <i>Harpalus affinis</i> (Schrank, 1781)          | hz, P, X   | 1   | 1    | +    | 1    | 171  |
| <i>H. anxius</i> (Duftschmid, 1812)              | hz, P, X   | +   | +    | +    | +    | 23   |
| <i>H. fuliginosus</i> (Panzer, 1809)             | hz, P, X   | +   | +    | +    | +    | 9    |

|                                                       |          |      |      |      |      |      |
|-------------------------------------------------------|----------|------|------|------|------|------|
| <i>H.latus</i> (Linnaeus, 1758)                       | hz       | +    | +    | 1    | 1    | 134  |
| <i>H.picipennis</i> (Duftschmid, 1812)                | hz, X    | +    | +    | +    | +    | 55   |
| <i>H.progrediens</i> Schauburger, 1922                | hz       | -    | +    | -    | -    | 1    |
| <i>H.rubripes</i> (Duftschmid, 1812)                  | hz, P, X | +    | +    | 1    | 1    | 126  |
| <i>H.quadripunctatus</i> Dejean, 1829                 | hz, P    | +    | +    | +    | +    | 14   |
| <i>H.rufipalpis</i> Sturm, 1818                       | hz, P, X | +    | 1    | 1    | 4.1  | 283  |
| <i>H.signaticornis</i> (Duftschmid, 1812)             | hz, P, X | +    | -    | +    | +    | 2    |
| <i>H.smaragdinus</i> (Duftschmid, 1812)               | hz, P, X | 1    | 1    | 1    | 1    | 269  |
| <i>H.tardus</i> (Panzer, 1797)                        | hz, P, X | 10.5 | 8.7  | 16.8 | 15.4 | 1735 |
| <i>H.tenebrosus</i> (Schauburger, 1929)               | hz, P, X | +    | +    | +    | +    | 14   |
| <i>Leistus ferrugineus</i> (Linnaeus, 1758)           | F, W     | +    | +    | -    | -    | 2    |
| <i>Masoreus wetterhalli</i> (Linnaeus, 1767)          | P, X     | -    | +    | +    | -    | 7    |
| <i>Notiophilus aquaticus</i> (Linnaeus, 1758)         |          | +    | +    | +    | +    | 15   |
| <i>N.biguttatus</i> (Fabricius, 1799)                 | F        | +    | -    | -    | -    | 1    |
| <i>N.germinyi</i> Fauvel in Grenier, 1863             | X        | -    | +    | -    | -    | 1    |
| <i>Panagaeus bipustulatus</i> (Fabricius, 1775)       | P, X     | -    | +    | -    | +    | 2    |
| <i>Pseudoophonus.rufipes</i> (De Geer, 1774)          | hz, P    | 15.3 | 19.2 | 10.2 | 22.4 | 2197 |
| <i>P.griseus</i> (Panzer, 1797)                       | hz, P, X | +    | +    | +    | +    | 44   |
| <i>Poecilus cupreus</i> (Linnaeus, 1758)              |          | +    | +    | +    | +    | 17   |
| <i>P.lepidus</i> (Leske, 1785)                        | X, W     | 17.8 | 14.4 | 12.9 | 13.5 | 1858 |
| <i>P.versicolor</i> (Sturm, 1824)                     |          | 1    | 1    | 1    | 5.6  | 559  |
| <i>Pterostichus melanarius</i> (Illiger, 1798)        | Z        | +    | +    | +    | +    | 34   |
| <i>P.niger</i> (Schaller, 1783)                       | Z, F, W  | 7.4  | 9.0  | 1    | 5.1  | 725  |
| <i>P.oblongopunctatus</i> (Fabricius, 1787)           | F        | +    | +    | +    | +    | 16   |
| <i>Syntomus foveatus</i> (Geoffroy in Fourcroy, 1785) | X        | +    | 1    | +    | +    | 103  |
| <i>Synuchus vivalis</i> (Illiger, 1798)               | P        | +    | +    | +    | +    | 49   |
